# Supplementary material for: Friend or foe? Biological and ecological traits of the European ash dieback pathogen Hymenoscyphus fraxineus in its native environment
Source: PubMed Central journal article supplement (PMC4761999; doi:10.1038/srep21895), 2016-02-22
Supplement: srep21895-s1.pdf [file srep21895-s1.pdf]

## Supplementary Information

Manuscript: “Friend or foe? Biological and ecological traits of the European ash dieback pathogen *Hymenoscyphus fraxineus* in its native environment.”

By : Michelle Cleary, Diem Nguyen, Diana Marčiulyrienė, Anna Berlin, Rimvys Vasaitis, and Jan Stenlid

Description of Supplementary Information:  
Sequences for fungal OTUs presented in Table 1.

>OTU\_0

TTAAGTTCAGCGGGTATCCCTACCTGATCCGAGGTCAACCTTGTGAAAGATTTAACGGCCGCGGCCGCCCGCA  
CTCCGAAGCGATTAATGAAATCACAACGCCAGGAGACGGACAGCTCAGCCGGAGACTTTGAGGCGCGCGGGGA  
AACCCCGCGGCCCAATACCAAGCCAGGCTTGAGTGGTGAAATGACGCTCGAACAGGCATGCCCTCCGGAAT  
ACCAGAGGGCGCAATGTGC

>OTU\_1

TTAAGTTCAGCGGGTATCCCTACCTGATCCGAGGTCAACCTTAGAAATGGGGTTGTTTTACGGCGTAGCCTCC  
CGAACACCCTTTAGCGAATAGTTTCCACAACGCTTAGGGGACAGAAGACCCAGCCGGTCGATTTGAGGCACGC  
GGCGGACCGCGTTGCCAATACCAAGCGAGGCTTGAGTGGTGAAATGACGCTCGAACAGGCATGCCCCCGGA  
ATACCAGGGGGCGCAATGTGC

>OTU\_5

TTAAGTTCAGCGGGTATTCCTACCTGATCCGAGGTCAAATTTTCAGAAGTTGGGGTTTAAACGGCAGGGCACC  
GCCAGGGCCTTCCAGAGCGAGGGTTTAACTACTGCGCTCGGGTCTGGCGAGCTCGCCACTGAATTTAGGG  
CCTGCTTCTTGGGTAAGAAGCAGTGCCCCATCACCAAGCCAGGCTTGAGGGTTGAAATGACGCTCGAACAGGC  
ATGCCCTCCGGAATACCAGAGGGCGCAATGTGC

>OTU\_3

TTAAGTTCAGCGGGTATCCCTACCTGATCCGAGGTCAAGAGTGTA AAAATGTACTTTTGGACGTCGTCGTTCT  
GAGTGCAAAGCGCGAGATGTACTGCGCTCCGAAATCAATACGCCGGCTGCCAATTGTTTTGAGGCGAGTCTAC  
GCGCAGAGGCGAGACAAACACCCAACCAAGCAAGCTTGAAGGTACAAATGACGCTCGAACAGGCATGCC  
CATGGAATACCAAGGGGCGCAATGTGC

>OTU\_2

TTAAGTTCAGCGGGTATCCCTACCTGATCCGAGGTCAAAAAGTTGAAAAAAGGCTTAATGGATGCTAGACCTT  
TGCTGATAGAGAGTGCGACTTGTGCTGCGCTCCGAAACCAGTAGGCCGGCTGCCAATTACTTTAAGGCGAGTC  
TCCAGCAAAGCTAGAGACAAGACGCCAACACCAAGCAAAGCTTGAGGGTACAAATGACGCTCGAACAGGCAT  
GCCCTTTGGAATACCAAAGGGGCGCAATGTGC

>OTU\_4

TTAAGTTCAGCGGGTAGTCCTACCTGATTTGAGGTGAGAAATATAAAGTGTAGTTAGAGTGGAGGGTTGCGAGA  
ACTTATTACGCATTTCCACTTAGACATTTAAGGCGAGCCAGTACTGGCAAACACCCAAAGCACAACATATAGAAA  
ACTATAGAGGTGAGGTTTATAAGACACTCAAACAGGCATGCCCTTCGGAATACCAAAGGGGCGCAATCTGC

>OTU\_8

TTAAGTTCAGCGGGTAGCCCTACCTGATTTGAGGCCAGATCATGAGATATGTGGGGTTATCAGCCACTTAGAA  
GGATGAAACGTATTACATCCAAAGTTGCTTATGCTTTTAAAGGTGAGCCAGTGACGGCAAACACCCAATCCACC  
ACCGCTCGGGCAAACCAAGTGGGGTGAGGTTTCATGACACTCAAACAGGCATGCCCTTCGGAATACCAA  
GGGCGCAAGGTGC

>OTU\_7

TTAAGTTCAGCGGGTATCCCTACCTGATCCGAGGTCAACCTGTAAAAATTGGGGTTGCTGGCAAGTAAACCT  
ACCGGACTCAAACGCGAGGAGTATTACTACGCGTAGAGCCGACAGGCACCGCCACTGATTTTAGAGGCCGCGG  
AACCGCAACCCCAAGACCAAGCGTGAGCTTGAGTGGTTGTAATGACGCTCGAACAGGCATGCCCCCGGAAT  
ACCAGAGGGCGCAATGTGC

>OTU\_6

TTAAGTTCAGCGGGTATCCCTACCTGATCCGAGGTCAAAAAGTGAAAAAGGCTTGTGGAAGCGGGCGTGTAGCC  
TTGAATCGCGACTTGTGCTGCGCTTCAAACCAAACACTGGCTGCCAATTACTTTAAGGCGAGTCCCTCGGGA  
CAAACACCCAACACCAAGCAAAGCTTGAAGGTACAAATGACGCTCGAACAGGCATGCCCATGGAATACCAAG  
GGGCGCAATGTGC

>OTU\_9

TTAAGTTCAGCGGGTATTCCTACCTGATCCGAGGTCAAATTTTCAGAAGTTGGGGTTTAAACGGCAGGGCACC  
GCCAGGGCCTTCCAAAGCGAGGGTTTAACTACTGCGCTCGGGTCTGGCGAGCTCGCCACTGAATTTAGGG  
CCTGCCCTTTTACAGGCAGTGCCCCATCACCAAGCCAGGCTTGAGGGTTGAAATGACGCTCGAACAGGCATGC  
CCTCCGGAATACCAGAGGGGCGCAATGTGC

>OTU\_13

TTAAGTTCAGCGGGTATCCCTACCTGATCCGAGGTCAACCTTTGAAAGATTTAACGGCCGCGACGACTCGAAC  
TCCACTGCGAATTGAATTGCCACAACGCTGGGAGACGAACCGCTCAGCCGGAGACTTTGAGGCGCGCGAGGGA  
CTCGCGACGCCAATACCAAGCGAGGCTTGAGTGGTGAAATGACGCTCGAACAGGCATGCCCCCGGAATACC  
AGGGGGCGCAATGTGC

>OTU\_15

TTAAGTTCAGCGGGTATCCCTACCTGATCCGAGGTCAAAGACGGTAAATTGCTTGCTGGACGCAGGCCGCAGC  
ACCTCAAGAAGCGCAATGTGCTGCGCGAGAGGTGGCGGAGACCGCTGCCAATGAATTTGGGGCGAGTCCACGC  
GCAAAGGCGGGACAGACGCCCAACACCAAGCAGAGCTTGAGGGTGTAGATGACGCTCGAACAGGCATGCCCCA  
TGGAATACCAAGGGGCGCAATGTGC

>OTU\_11

TTAAGTTCAGCGGGTATCCCTACCTGATCCGAGGTCAACCCTAGAGAGTTGGGGGTTGCTGGCAAGACACCGC  
AAGGACCCTATCGCGAGAAGAATTACTACGCGTAGAGCCTTAGGGCACCGCCACTGGTTTTAAGGCCGCCCA  
AAGGCGCAGCCCAAGACCCCGCGGAGCGGGAGTTGGTCTAAATGACGCTCGAACAGGCATGCCCCCGGAAT  
ACCAAGGGGCGCAATGTGC

>OTU\_18

TTAAGTTCAGCGGGTATCCCTACCTGATCCGAGGTCAAGTCATGAAATTGCTTGCTGGACGCTGATCCGCCGG  
GGCTCCAAGAAGCGCAAATGTGCTGCGCGAGAAGCCGACGAGACCGCTGCCAATGACTTTGAGGGCGAGTCCGC  
GCACGGAGGCGGGACAGACGCCCAACACCAAGCAGAGCTTGAGGGTGTAAATGACGCTCGAACAGGCATGCC  
CACGAATACCGAGGGGCGCAATGTGC

>OTU\_20

TTAAGTTCAGCGGGTATCCCTACCTGATCCGAGGTCAACCTTTGAAAGATTTAACGGCCGCGACGTCTCACAC  
TCCACTGCGAAATAGTTGCCACAACGCTGGGAGATGAACCGTACAGCCGGAGACTTTGAGGCGCGCGAGAGAC  
TCGCGACGCCCAATACCAAGCGAGGCTTGAGTGGTGAATGACGCTCGAACAGGCATGCCCCCGGAATACCA  
GGGGGCGCAATGTGC

>OTU\_14

TTAAGTTCAGCGGGTATCCCTACCTGATCCGAGGTCAACCTGAAAAAATAAAAGGTTTTACGGCAATGAGATC  
TCAACAAGCTTATAAGACGTTTTGATTTAACTCTACTACGCCGAAGTTGGAGAAACCCCGCGAGGTCTTCG  
AGGCACGCCCGTCTTTTCGACGGACGATGCCAATACCAAGCAGTGCTTGAGTGGTGAATGACGCTCGAACAG  
GCATGCCCTCGGAATACCAAGGGGCGCAATGTGC

>OTU\_12

TTAAGTTCAGCGGGTAGTCCTACCTGATTTGAGGTGAGAGATAAAAGTGTATTAGAGTGGAGGGAGCGAAAAC  
TTATTACGCATTCCACTTAGACATTTAAGACGAGCCAAAGCATGGCAGACGTCCAAAGCACCCAACTCGAAAA  
CCCGAGAGGATGAGTCTATATGACACTCAAACAGGCATGCTCTTCGGAATACCAAAGAGCGCAATGTGC

>OTU\_10

TTAAGTTCAGCGGGTATCCCTACCTGATCCGAGGTCAACCTTTAAAAAATTGGGGGTTACTGGCAAGACACCA  
CCGAGACCCTATAGCGAGAAGAATTACTACGCTCAGAGCTCGAGGGCACCGCCACTGGGTTTAGAGGCTGCGG  
AATCGCAGGCCCAAGACCAAGCCGAAGCTTGATGGGTTGAAATGACGCTCGAACAGGCATGCCCCGCGGAAT  
ACCACGGGGCGCAATGTGC

>OTU\_21

TTAAGTTCAGCGGGTATCCCTACCTGATCCGAGGTCAACCTGAAAAAGAGGTTGGACGGCACAACCTCCGACCG  
GCCACCGACGCGAGACAGATGCCACAACGCGAGGGGACGGACGGCGTGGCCGGCGACATTTGGGGCGGGCGCC  
AGAAGCCGCGGGCGCCCAACACCCAGCGGGGCTGGATTGGTGACAATGACGCTCGAACAGGCATGCCCCCGGA  
ATACCAGAGGGGCGCAATGTGC

>OTU\_17

TTAAGTTCAGCGGGTATTCCTACCTGATCCGAGGTCAACATTCAGAAGTTGGGGTTTTACGGCATGGCCGCGC  
CGGTTCCAGTTGCGAGGTGTTAGCTACTACGCAATGGAGGCTGCAGCGAGACCGCCAATGTATTTGGGGGCG  
GGCACCGCCAGAAGGCAGAGCCGATCCCCAACACCAAAACCCGGGGGCTTGAGGGTTGAAATGACGCTCGAAC  
GGCATGCCCGCCGGAATACCAGCGGGGCGCAATGTGC
